# Supplementary material for: Designed formation of Cu 2 S hierarchical nanostructures as self-supported photoelectrodes for photo-supercapacitors
Source: Royal Society of Chemistry journal article supplement (doi:10.1039/d5na00327j), 2025-01-01
Supplement: d5na00327j1.pdf [file d5na00327j1.pdf]

## Supplementary Information

### **Designed formation of Cu<sub>2</sub>S hierarchical nanostructures as self-supported photoelectrodes for photo-supercapacitors**

Ruitong Xu,<sup>a†</sup> Muhammad Arif,<sup>a†</sup> Guopeng Pan,<sup>a</sup> Lin Xu<sup>ab\*</sup> and Ting Zhu<sup>ab\*</sup>

<sup>a</sup> School of Physics and Electronic Information, Yunnan Normal University, 768 Juxian Street, Kunming 650500, Yunnan, China.

<sup>b</sup> Yunnan Key Laboratory of Optoelectronic Information Technology, School of Physics and Electronic Information, Yunnan Normal University, Kunming 650500, China.

\*Email: Xulin13888488199@163.com (L. Xu); zhut0002@ynnu.edu.cn (T. Zhu)

<sup>†</sup>These authors contributed equally.

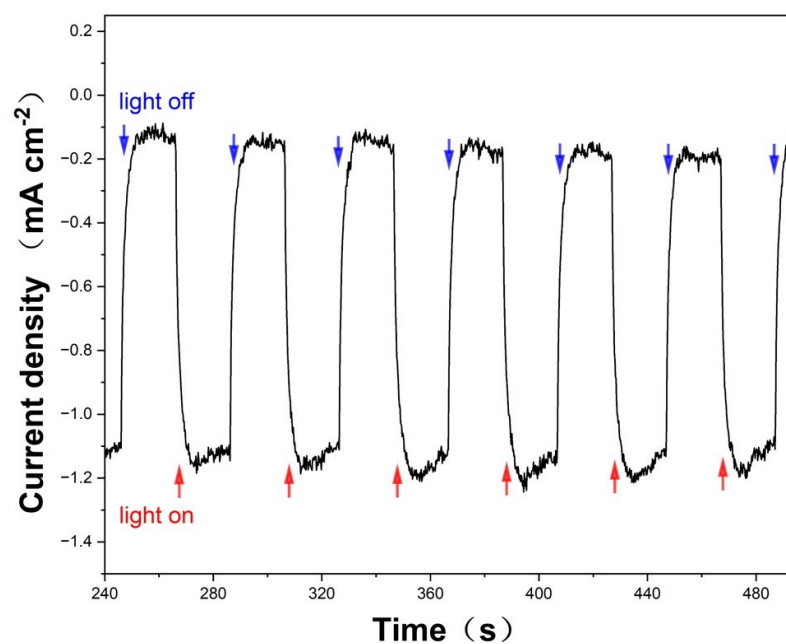

**Fig. S1.** The photocurrent response of the CF@Cu<sub>2</sub>S-100 sample was obtained with a time interval of 20 s.

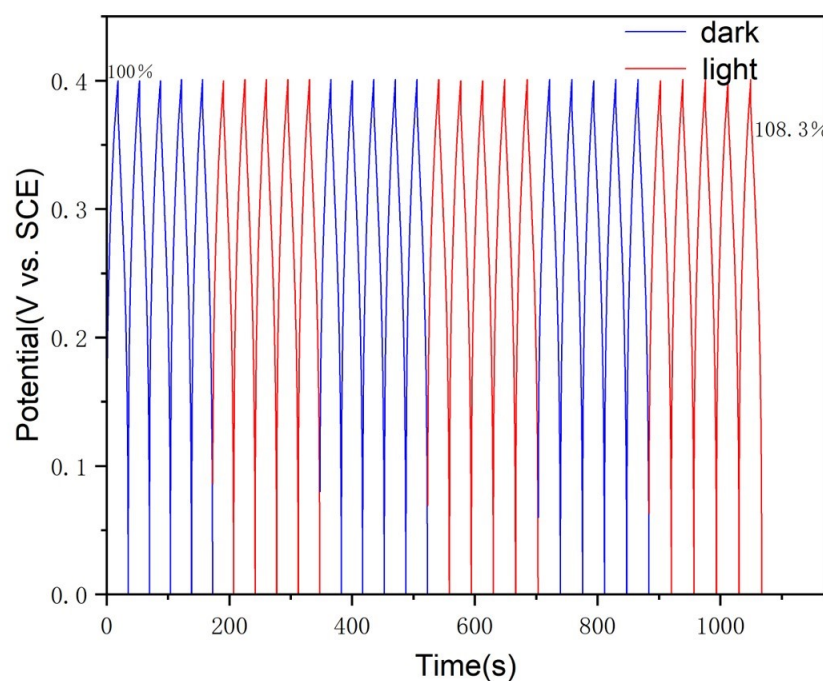

**Fig. S2.** The GCD curves were obtained at 20 mA cm<sup>-2</sup> under a switched light on/off mode for the CF@Cu<sub>2</sub>S-100 sample.

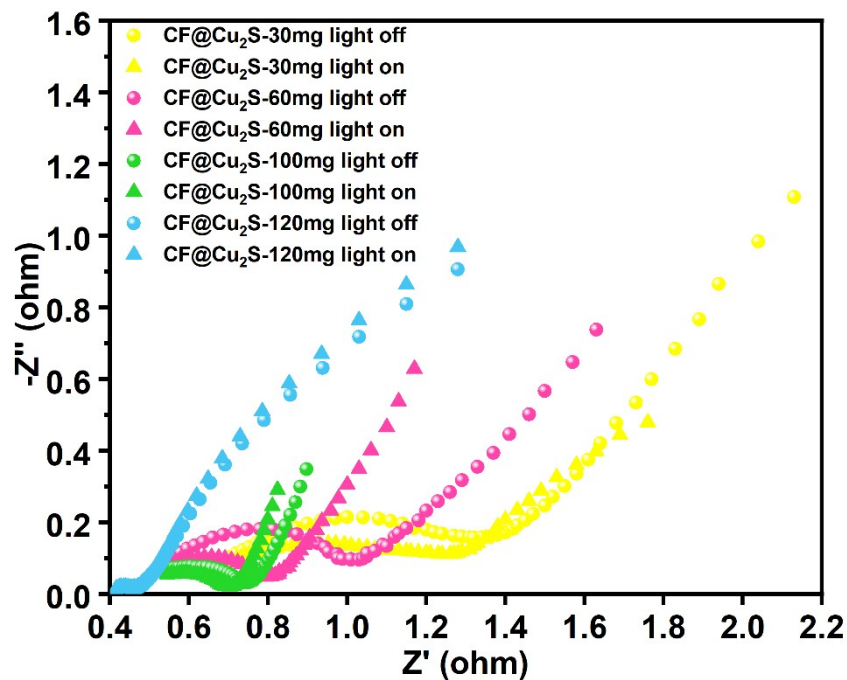

Fig. S3. EIS plots of CF@Cu<sub>2</sub>S electrodes.

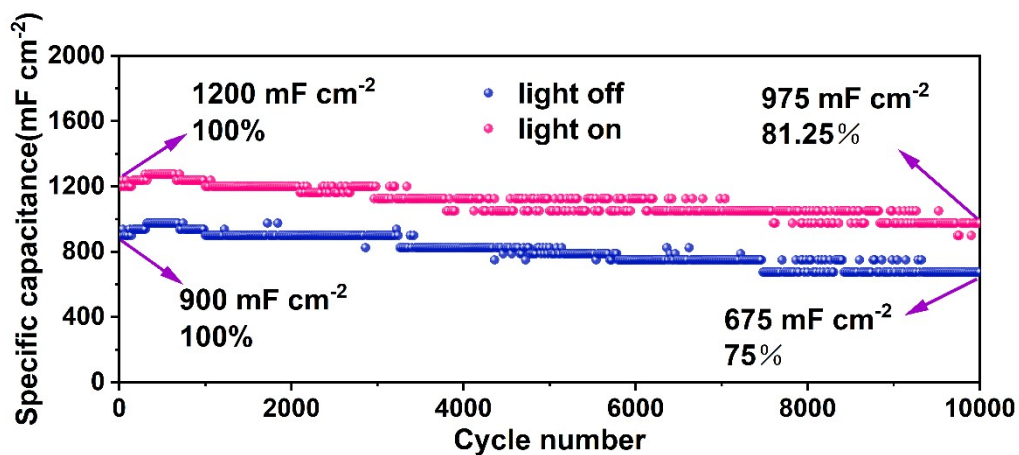

Fig. S4. Cycling performances under light off and on conditions of the CF@Cu<sub>2</sub>S-100 sample at a current density of 30  $\text{mA cm}^{-2}$  using a light source with a single wavelength of 365 nm.

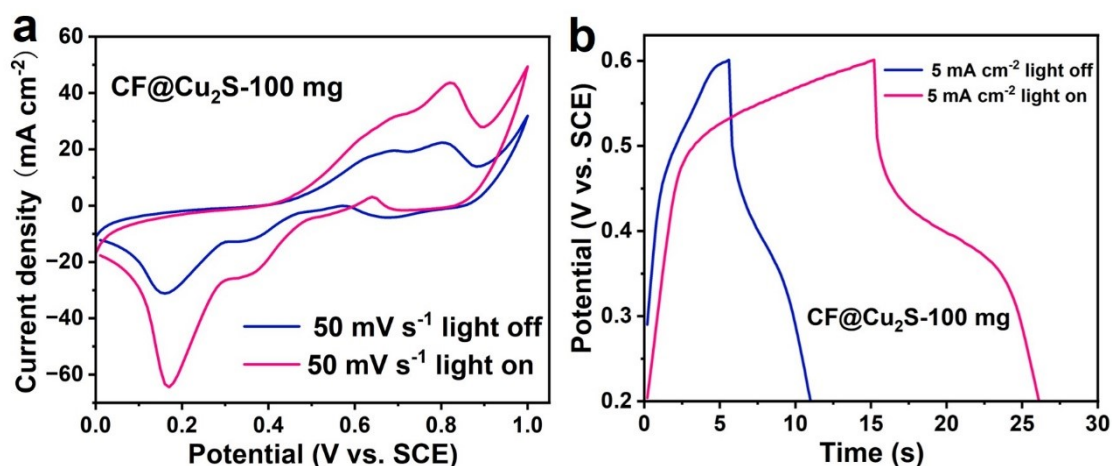

**Fig. S5.** (a) CV and (b) GCCD curves obtained under light on and off conditions, respectively, of the CF@Cu<sub>2</sub>S-100 sample.

**Table S1.** A comparison of the electrochemical performance of CF@Cu<sub>2</sub>S-100 with various PSC composites has been previously reported.

| PSC devices                                            | Capacitance<br>(dark)         | Capacitance<br>(Light)         | References       |
|--------------------------------------------------------|-------------------------------|--------------------------------|------------------|
| CL@SnS/NF                                              | 15.7 mF cm <sup>-2</sup>      | 21.0 mF cm <sup>-2</sup>       | [1]              |
| CoCN-0.55                                              | 943.8 mF cm <sup>-2</sup>     | 1088.0 mF cm <sup>-2</sup>     | [2]              |
| Cu <sub>2</sub> O/Fe <sub>2</sub> O <sub>3</sub>       | 507 F g <sup>-1</sup>         | 595 F g <sup>-1</sup>          | [3]              |
| BVO-V <sub>2</sub> O <sub>5</sub> @TiNT                | 100 mF cm <sup>-2</sup>       | 288 mF cm <sup>-2</sup>        | [4]              |
| NiCo <sub>2</sub> S <sub>4</sub> @Cu <sub>2</sub> O@CF | 733.3 mF cm <sup>-2</sup>     | 1156.7 mF cm <sup>-2</sup>     | [5]              |
| <b>CF@Cu<sub>2</sub>S-100</b>                          | <b>918 mF cm<sup>-2</sup></b> | <b>1458 mF cm<sup>-2</sup></b> | <b>This work</b> |

#### References:

- Li, T., et al., *Flake-like SnS anchored on the carbon layer for supercapacitor electrode with photo-responsive capacitance enhancement*. Journal of Alloys and Compounds, 2024. **976**: p. 173377.
- Bai, L., et al., *Photocatalysis-assisted Co<sub>3</sub>O<sub>4</sub>/g-C<sub>3</sub>N<sub>4</sub> p-n junction all-solid-state supercapacitors: a bridge between energy storage and photocatalysis*. Advanced science, 2020. **7**(22): p. 2001939.
- Lv, X., et al., *Construction of light-sensitive Cu<sub>2</sub>O/Fe<sub>2</sub>O<sub>3</sub> heterostructures to*

- promote photocatalytic CO<sub>2</sub> reduction and photo-assisted charge storage. Sustainable Energy & Fuels, 2024. 8(21): p. 4992-5000.*
4. Renani, A.S., et al., *New photoelectrodes based on bismuth vanadate-V<sub>2</sub>O<sub>5</sub>@TiNT for photo-rechargeable supercapacitors.* Journal of Energy Storage, 2023. **62**: p. 106866.
  5. Arif, M., et al., *Construction of three-dimensional NiCo<sub>2</sub>S<sub>4</sub>@Cu<sub>2</sub>O nanowires with a high surface photovoltage to promote the energy efficiency of photo-assisted supercapacitors.* Journal of Colloid and Interface Science, 2025: p. 138067.
